# Supplementary material for: Novel Humanized Monoclonal Antibodies for Targeting Hypoxic Human Tumors via Two Distinct Extracellular Domains of Carbonic Anhydrase IX
Source: Research Square preprint supplement (doi:10.21203/rs.3.rs-827745/v1), 2021-08-30
Supplement: Supplementary file 1 [file a80b2ce6f0091bb21b2ddbe5.docx]

Miriam Zatovicova1,2, Ivana Kajanova2, Monika Barathova1,2, Martina Takacova2, Martina Labudova1,2, Lucia Csaderova2, Lenka Jelenska2, Eliska Svastova2 , Silvia Pastorekova2, Adrian L. Harris* 3 and Jaromir Pastorek* 1

1 MABPRO, a.s., Dubravska cesta 2, 841 04 Bratislava, Slovakia

2 Department of Tumor Biology, Institute of Virology, Biomedical Research Center, Slovak Academy of Sciences, Dubravska cesta 9, 84505 Bratislava, Slovakia;

3 Department of Oncology, University of Oxford, Old Road Campus Research Building, Roosevelt Drive, OX3 7DQ, Oxford, United Kingdom

*Senior authors

**Correspondence**: Jaromir Pastorek ([jaromir.pastorek@mabpro.sk](mailto:jaromir.pastorek@mabpro.sk))

**AUTHOR CONTRIBUTIONS** M.Z., I.K., L.J., M.B., M.T., L.C., E.S. and M.L. performed immunodection assays, confocal analyses, animal experiments and statistics. S.P. and A.L.H. provided expert advice and edited the manuscript, J.P. designed and supervised the study, interpreted the results and wrote the manuscript.

**ACKNOWLEDGEMENTS** We wish to thank Julia Brizekova and Dr Ingeborg Rezuchova (from the Biomedical Research Center SAS, Slovakia and Mabpro) for their help with the paperwork assistance and to Lubomira Lukacikova and Katarina Grossmannova (from the Biomedical Research Center SAS, Slovakia) for their help with in vivo experiments.

**Competing interests** J.P., S.P., M.Z. and M.B. are co-inventors of patents related to CA IX. J.P. and S.P. are members of the Scientific Advisory Board of MABPRO, ltd. The remaining authors declare no conflicts of interests.

**Funding information** This work was supported by funding from the private company MABPRO, a.s., the incentives for the research and development provided by the Ministry of Education, Science, Research and Sport of the Slovak Republic for a project no. 2018/14554:1-26C0 named “Development of humanized antibodies for targeted therapy of hypoxic tumors”, and an awarded grant no. APVV-16-0343 provided by the Slovak Research and Development Agency.

**Email addresses of listed authors:**

Miriam Zatovicova, miriam.zatovicova@mabpro.sk

Ivana Kajanova, [viruivvi@savba.sk](mailto:viruivvi@savba.sk)

Monika Barathova, monika.barathova@mabpro.sk

Martina Takacova, virumata@savba.sk

Martina Labudova, martina.labudova@mabpro.sk

Lucia Csaderova, lucia.csaderova@savba.sk

Lenka Jelenska, virulesu@savba.sk

Eliska Svastova, eliska.svastova@savba.sk

Silvia Pastorekova, silvia.pastorekova@savba.sk

Adrian L. Harris, adrian.harris@oncology.ox.ac.uk

Jaromir Pastorek, jaromir.pastorek@mabpro.sk
